# Supplementary material for: Bacterial biofilms predominate in both acute and chronic human lung infections
Source: PubMed Central journal article supplement — Thorax. 2022 Jan 11;77(10):1015–22. doi: 10.1136/thoraxjnl-2021-217576 (PMC9510407; doi:10.1136/thoraxjnl-2021-217576), 2022-01-11
Supplement: thoraxjnl-2021-217576supp001.pdf [file thoraxjnl-2021-217576supp001.pdf]

| <b>Supplemental table 1. Detected pathogens in sputum from 29 patients admitted with acute respiratory tract infection and 14 CF patients with chronic infection.</b> |                   |                    |                  |
|-----------------------------------------------------------------------------------------------------------------------------------------------------------------------|-------------------|--------------------|------------------|
|                                                                                                                                                                       | <b>CAP (n=16)</b> | <b>COPD (n=13)</b> | <b>CF (n=14)</b> |
| <b>Negative sputum, n (%)</b>                                                                                                                                         | 8 (50.0)          | 7 (53.8)           | 0 (0)            |
| <b>Positive sputum, n (%)</b>                                                                                                                                         | 8 (50.0)          | 6 (46.2)           | 14 (100.0)       |
| <b><i>S. pneumoniae</i>, n (%)</b>                                                                                                                                    | 3 (18.8)          | 1 (7.7)            | 0 (0)            |
| <b><i>H. influenzae</i>, n (%)</b>                                                                                                                                    | 1 (6.3)           | 3 (23.1)           | 0 (0)            |
| <b><i>Moraxella sp.</i>, n (%)</b>                                                                                                                                    | 2 (12.5)          | 1 (7.7)            | 0 (0)            |
| <b><i>Mycoplasma sp.</i>, n (%)</b>                                                                                                                                   | 0 (0)             | 0 (0)              | 0 (0)            |
| <b><i>N. meningitidis</i>, n (%)</b>                                                                                                                                  | 1 (6.3)           | 0 (0)              | 0 (0)            |
| <b><i>Klebsiella sp.</i>, n (%)</b>                                                                                                                                   | 0 (0)             | 1 (7.7)            | 0 (0)            |
| <b><i>P. aeruginosa</i> non mucoid, n (%)</b>                                                                                                                         | 0 (0)             | 1 (7.7)            | 9 (64.3)         |
| <b><i>P. aeruginosa</i> mucoid, n (%)</b>                                                                                                                             | 0 (0)             | 0 (0)              | 6 (42.9)         |
| <b><i>A. xylosoxidans</i>, n (%)</b>                                                                                                                                  | 0 (0)             | 0 (0)              | 1 (7.1)          |
| <b><i>S. aureus</i>, n (%)</b>                                                                                                                                        | 0 (0)             | 1 (7.7)            | 2 (14.3)         |
| <b><i>M. abscessus</i>, n (%)</b>                                                                                                                                     | 0 (0)             | 0 (0)              | 1 (7.1)          |
| <b><i>K. pneumoniae</i>, n (%)</b>                                                                                                                                    | 0 (0)             | 0 (0)              | 1 (7.1)          |
| <b><i>S. maltophilia</i>, n (%)</b>                                                                                                                                   | 0 (0)             | 0 (0)              | 1 (7.1)          |
| <b><i>B. multivorans</i>, n (%)</b>                                                                                                                                   | 0 (0)             | 0 (0)              | 2 (14.3)         |
| <b>Mold, n (%)</b>                                                                                                                                                    | 0 (0)             | 0 (0)              | 5 (35.7)         |
