# Supplementary material for: Bacterial biofilms predominate in both acute and chronic human lung infections
Source: PubMed Central journal article supplement — Thorax. 2022 Jan 11;77(10):1015–22. doi: 10.1136/thoraxjnl-2021-217576 (PMC9510407; doi:10.1136/thoraxjnl-2021-217576), 2022-01-11
Supplement: thoraxjnl-2021-217576supp002.pdf [file thoraxjnl-2021-217576supp002.pdf]

| <b>Supplemental table 2. Detected virus in sputum from 29 patients admitted with acute respiratory tract infection.</b> |                   |                    |                  |
|-------------------------------------------------------------------------------------------------------------------------|-------------------|--------------------|------------------|
|                                                                                                                         | <b>CAP (n=16)</b> | <b>COPD (n=13)</b> | <b>CF (n=14)</b> |
| <b>Negative nasopharyngeal swap/sputum, n (%)</b>                                                                       | 8 (50.0)          | 7 (53.8)           | NA               |
| <b>Positive nasopharyngeal swap/sputum, n (%)</b>                                                                       | 8 (50.0)          | 6 (46.2)           | NA               |
| <b>Respiratory syncytial virus RSV, n (%)</b>                                                                           | 3 (18.8)          | 1 (7.7)            | NA               |
| <b>Influenza A, n (%)</b>                                                                                               | 1 (6.3)           | 3 (23.1)           | NA               |
| <b>Influenza B, n (%)</b>                                                                                               | 2 (12.5)          | 1 (7.7)            | NA               |
| <b>Coronavirus, n (%)</b>                                                                                               | 0 (0)             | 0 (0)              | NA               |
| <b>Rhinovirus/Enterovirus, n (%)</b>                                                                                    | 1 (6.3)           | 0 (0)              | NA               |
| <b>Human metapneumovirus, n (%)</b>                                                                                     | 0 (0)             | 1 (7.7)            | NA               |
