# Supplementary material for: Bacterial biofilms predominate in both acute and chronic human lung infections
Source: PubMed Central journal article supplement — Thorax. 2022 Jan 11;77(10):1015–22. doi: 10.1136/thoraxjnl-2021-217576 (PMC9510407; doi:10.1136/thoraxjnl-2021-217576), 2022-01-11
Supplement: thoraxjnl-2021-217576supp003.pdf [file thoraxjnl-2021-217576supp003.pdf]

**Supplemental table 3. Observed and detected pathogens in biofilms and as planktonic cells in sputum from 29 patients admitted with acute respiratory tract infection and 14 CF patients with chronic infection.**

|      | Patient ID | Observed biofilm | Observed single cells | No detected pathogen in sputum | Detected pathogen in sputum | <i>S. pneumoniae</i> | <i>H. Influenza</i> | <i>Moraxella sp.</i> | <i>Mycoplasma sp.</i> | <i>N. meningitidis</i> | <i>Klebsiella sp.</i> | <i>P. aeruginosa non mucoïd</i> | <i>P. aeruginosa mucoïd</i> | <i>A. xylosoxidans</i> | <i>S. aureus</i> | <i>M. abscessus</i> | <i>K. pneumoniae</i> | <i>S. Maltophilia</i> | <i>B. multivorans</i> | Mold |  |  |  |
|------|------------|------------------|-----------------------|--------------------------------|-----------------------------|----------------------|---------------------|----------------------|-----------------------|------------------------|-----------------------|---------------------------------|-----------------------------|------------------------|------------------|---------------------|----------------------|-----------------------|-----------------------|------|--|--|--|
| CAP  | 2          | 008              |                       |                                | X                           |                      |                     |                      |                       |                        |                       |                                 |                             |                        |                  |                     |                      |                       |                       |      |  |  |  |
|      | 4          | 057              | X                     | X                              | X                           |                      |                     |                      |                       |                        |                       |                                 |                             |                        |                  |                     |                      |                       |                       |      |  |  |  |
|      | 6          | 062              | X                     | X                              | X                           |                      |                     |                      |                       |                        |                       |                                 |                             |                        |                  |                     |                      |                       |                       |      |  |  |  |
|      | 8          | 064              | X                     | X                              |                             | X                    |                     | X                    |                       |                        |                       |                                 |                             |                        |                  |                     |                      |                       |                       |      |  |  |  |
|      | 10         | 069              | X                     | X                              | X                           |                      |                     |                      |                       |                        |                       |                                 |                             |                        |                  |                     |                      |                       |                       |      |  |  |  |
|      | 12         | 079              |                       |                                | X                           |                      |                     |                      |                       |                        |                       |                                 |                             |                        |                  |                     |                      |                       |                       |      |  |  |  |
|      | 14         | 087              | X                     | X                              |                             | X                    | X                   |                      |                       |                        |                       |                                 |                             |                        |                  |                     |                      |                       |                       |      |  |  |  |
|      | 16         | 089              | X                     | X                              |                             | X                    |                     | X                    |                       |                        |                       |                                 |                             |                        |                  |                     |                      |                       |                       |      |  |  |  |
|      | 20         | 106              | X                     | X                              | X                           |                      |                     |                      |                       |                        |                       |                                 |                             |                        |                  |                     |                      |                       |                       |      |  |  |  |
|      | 22         | 110              | X                     | X                              |                             | X                    |                     |                      |                       |                        |                       |                                 |                             |                        |                  |                     |                      |                       |                       |      |  |  |  |
|      | 24         | 114              | X                     | X                              | X                           |                      |                     |                      |                       |                        |                       |                                 |                             |                        |                  |                     |                      |                       |                       |      |  |  |  |
|      | 26         | 120              | X                     | X                              |                             | X                    |                     |                      | X                     |                        |                       |                                 |                             |                        |                  |                     |                      |                       |                       |      |  |  |  |
|      | 28         | 128              | X                     | X                              |                             | X                    | X                   |                      |                       |                        |                       |                                 |                             |                        |                  |                     |                      |                       |                       |      |  |  |  |
|      | 29         | 129              | X                     | X                              |                             | X                    | X                   |                      |                       |                        |                       |                                 |                             |                        |                  |                     |                      |                       |                       |      |  |  |  |
|      | 30         | 131              | X                     | X                              | X                           |                      |                     |                      |                       |                        |                       |                                 |                             |                        |                  |                     |                      |                       |                       |      |  |  |  |
| 31   | 132        | X                | X                     |                                | X                           |                      |                     |                      | X                     |                        |                       |                                 |                             |                        |                  |                     |                      |                       |                       |      |  |  |  |
| COPD | 32         | 136              | X                     | X                              |                             | X                    |                     |                      |                       |                        | X                     | X                               |                             |                        |                  |                     |                      |                       |                       |      |  |  |  |
|      | 33         | 140              | X                     | X                              |                             | X                    | X                   |                      |                       |                        |                       |                                 |                             |                        |                  |                     |                      |                       |                       |      |  |  |  |
|      | 34         | 100              | X                     | X                              |                             | X                    | X                   | X                    |                       |                        |                       |                                 |                             |                        |                  |                     |                      |                       |                       |      |  |  |  |
|      | 35         | 103              |                       |                                | X                           |                      |                     |                      |                       |                        |                       |                                 |                             |                        |                  |                     |                      |                       |                       |      |  |  |  |
|      | 36         | 092              | X                     | X                              | X                           |                      |                     |                      |                       |                        |                       |                                 |                             |                        |                  |                     |                      |                       |                       |      |  |  |  |
|      | 37         | 094              |                       |                                | X                           |                      |                     |                      |                       |                        |                       |                                 |                             |                        |                  |                     |                      |                       |                       |      |  |  |  |
|      | 38         | 137              | X                     | X                              | X                           |                      |                     |                      |                       |                        |                       |                                 |                             |                        |                  |                     |                      |                       |                       |      |  |  |  |
|      | 39         | 013              | X                     | X                              | X                           |                      |                     |                      |                       |                        |                       |                                 |                             |                        |                  |                     |                      |                       |                       |      |  |  |  |
|      | 40         | 122              | X                     | X                              |                             | X                    |                     |                      |                       |                        |                       |                                 |                             |                        | X                |                     |                      |                       |                       |      |  |  |  |
|      | 41         | 123              |                       | X                              | X                           |                      |                     |                      |                       |                        |                       |                                 |                             |                        |                  |                     |                      |                       |                       |      |  |  |  |
|      | 42         | 090              | X                     | X                              |                             | X                    |                     | X                    |                       |                        |                       |                                 |                             |                        |                  |                     |                      |                       |                       |      |  |  |  |
|      | 45         | 085              | X                     | X                              |                             | X                    |                     |                      | X                     |                        |                       |                                 |                             |                        |                  |                     |                      |                       |                       |      |  |  |  |
|      | 47         | 107              | X                     | X                              | x                           |                      |                     |                      |                       |                        |                       |                                 |                             |                        |                  |                     |                      |                       |                       |      |  |  |  |
