# Supplementary material for: Bacterial biofilms predominate in both acute and chronic human lung infections
Source: HighWire-hosted journal article supplement (doi:10.1136/thoraxjnl-2021-217576), 2022-01-11
Supplement: thoraxjnl-2021-217576supp004_data_supplement.pdf [file thoraxjnl-2021-217576supp004_data_supplement.pdf]

**Supplemental table 3 (Continued). Observed and detected pathogens in biofilms and as planktonic cells in sputum from 29 patients admitted with acute respiratory tract infection and 14 CF patients with chronic infection.**

|    | Patient ID | Observed biofilm | Observed single cells | No detected pathogen in sputum | Detected pathogen in sputum | <i>S. pneumoniae</i> | <i>H. Influenza</i> | <i>Moraxella sp.</i> | <i>Mycoplasma sp.</i> | <i>N. meningitidis</i> | <i>Klebsiella sp.</i> | <i>P. aeruginosa non mucoid</i> | <i>P. aeruginosa mucoid</i> | <i>A. xylosoxidans</i> | <i>S. aureus</i> | <i>M. abscessus</i> | <i>K. pneumoniae</i> | <i>S. Maltophilia</i> | <i>B. multivorans</i> | Mold |   |   |
|----|------------|------------------|-----------------------|--------------------------------|-----------------------------|----------------------|---------------------|----------------------|-----------------------|------------------------|-----------------------|---------------------------------|-----------------------------|------------------------|------------------|---------------------|----------------------|-----------------------|-----------------------|------|---|---|
| CF | 1          | 17               | X                     | X                              |                             |                      |                     |                      |                       |                        |                       | X                               | X                           |                        |                  |                     |                      |                       |                       |      |   |   |
|    | 3          | 59               | X                     | X                              |                             |                      |                     |                      |                       |                        |                       | X                               | X                           |                        |                  |                     |                      |                       |                       |      |   |   |
|    | 5          | 63               | X                     | X                              |                             |                      |                     |                      |                       |                        |                       | X                               | X                           |                        |                  |                     |                      |                       |                       |      | X |   |
|    | 9          | 273              | X                     | X                              |                             |                      |                     |                      |                       |                        |                       | X                               |                             |                        |                  |                     |                      |                       |                       |      |   |   |
|    | 11         | 301              | X                     | X                              |                             |                      |                     |                      |                       |                        |                       | X                               |                             |                        | X                |                     |                      |                       |                       |      | X |   |
|    | 13         | 355              | X                     | X                              |                             |                      |                     |                      |                       |                        |                       |                                 | X                           |                        |                  |                     |                      |                       |                       |      |   |   |
|    | 15         | 396              | X                     | X                              |                             |                      |                     |                      |                       |                        |                       |                                 |                             | X                      |                  | X                   | X                    |                       |                       |      |   |   |
|    | 17         | 408              | X                     | X                              |                             |                      |                     |                      |                       |                        |                       |                                 | X                           |                        |                  |                     |                      | X                     |                       |      | X |   |
|    | 19         | 452              | X                     | X                              |                             |                      |                     |                      |                       |                        |                       |                                 |                             |                        | X                |                     |                      |                       |                       | X    |   |   |
|    | 21         | 499              | X                     | X                              |                             |                      |                     |                      |                       |                        |                       |                                 | X                           | X                      |                  |                     |                      |                       |                       |      |   |   |
|    | 23         | 221              |                       | X                              |                             |                      |                     |                      |                       |                        |                       |                                 | X                           |                        |                  |                     |                      |                       |                       |      | X |   |
|    | 48         | 264              |                       |                                |                             |                      |                     |                      |                       |                        |                       |                                 | X                           |                        |                  |                     |                      |                       |                       |      |   |   |
|    | 49         | 286              | X                     | X                              |                             |                      |                     |                      |                       |                        |                       |                                 |                             | X                      |                  |                     |                      |                       |                       |      |   | X |
|    | 50         | 413              | X                     | X                              |                             |                      |                     |                      |                       |                        |                       |                                 |                             |                        |                  |                     |                      |                       |                       | X    |   |   |
