# Supplementary material for: Bacterial biofilms predominate in both acute and chronic human lung infections
Source: PubMed Central journal article supplement — Thorax. 2022 Jan 11;77(10):1015–22. doi: 10.1136/thoraxjnl-2021-217576 (PMC9510407; doi:10.1136/thoraxjnl-2021-217576), 2022-01-11
Supplement: thoraxjnl-2021-217576supp005.pdf [file thoraxjnl-2021-217576supp005.pdf]

| <b>Supplemental table 4. Detected virus in sputum from 29 patients admitted with respiratory tract infection</b> |                   |     |              |                                            |                                            |                                         |                    |                    |                    |                               |                              |
|------------------------------------------------------------------------------------------------------------------|-------------------|-----|--------------|--------------------------------------------|--------------------------------------------|-----------------------------------------|--------------------|--------------------|--------------------|-------------------------------|------------------------------|
|                                                                                                                  | <b>Patient ID</b> |     | <b>Virus</b> | <b>Negative nasopharyngeal swap/sputum</b> | <b>Positive nasopharyngeal swap/sputum</b> | <b>Respiratory syncytial virus, RSV</b> | <b>Influenza A</b> | <b>Influenza B</b> | <b>Coronavirus</b> | <b>Rhinovirus/Enterovirus</b> | <b>Human metapneumovirus</b> |
| <b>CAP</b>                                                                                                       | 2                 | 008 |              | X                                          |                                            |                                         |                    |                    |                    |                               |                              |
|                                                                                                                  | 4                 | 057 |              |                                            | X                                          | X                                       |                    |                    |                    |                               |                              |
|                                                                                                                  | 6                 | 062 |              | X                                          |                                            |                                         |                    |                    |                    |                               |                              |
|                                                                                                                  | 8                 | 064 |              | X                                          |                                            |                                         |                    |                    |                    |                               |                              |
|                                                                                                                  | 10                | 069 |              | X                                          |                                            |                                         |                    |                    |                    |                               |                              |
|                                                                                                                  | 12                | 079 |              | X                                          |                                            |                                         |                    |                    |                    |                               |                              |
|                                                                                                                  | 14                | 087 |              |                                            | X                                          | X                                       |                    |                    |                    |                               |                              |
|                                                                                                                  | 16                | 089 |              |                                            | X                                          |                                         | X                  |                    |                    |                               |                              |
|                                                                                                                  | 20                | 106 |              |                                            | X                                          |                                         |                    | X                  |                    |                               |                              |
|                                                                                                                  | 22                | 110 |              | X                                          |                                            |                                         |                    |                    |                    |                               |                              |
|                                                                                                                  | 24                | 114 |              |                                            | X                                          |                                         |                    |                    |                    | X                             |                              |
|                                                                                                                  | 26                | 120 |              |                                            | X                                          |                                         |                    | X                  |                    |                               |                              |
|                                                                                                                  | 28                | 128 |              |                                            | X                                          |                                         |                    | X                  |                    |                               |                              |
|                                                                                                                  | 29                | 129 |              |                                            | X                                          | X                                       |                    |                    |                    |                               |                              |
|                                                                                                                  | <b>COPD</b>       | 30  | 131          |                                            | X                                          |                                         |                    |                    |                    |                               |                              |
| 31                                                                                                               |                   | 132 |              | X                                          |                                            |                                         |                    |                    |                    |                               |                              |
| 32                                                                                                               |                   | 136 |              | X                                          |                                            |                                         |                    |                    |                    |                               |                              |
| 33                                                                                                               |                   | 140 |              | X                                          |                                            |                                         |                    |                    |                    |                               |                              |
| 34                                                                                                               |                   | 100 |              |                                            | X                                          |                                         |                    |                    |                    | X                             |                              |
| 35                                                                                                               |                   | 103 |              | X                                          |                                            |                                         |                    |                    |                    |                               |                              |
| 36                                                                                                               |                   | 092 |              | X                                          |                                            |                                         |                    |                    |                    |                               |                              |
| 37                                                                                                               |                   | 094 |              | X                                          |                                            |                                         |                    |                    |                    |                               |                              |
| 38                                                                                                               |                   | 137 |              | X                                          |                                            |                                         |                    |                    |                    |                               |                              |
| 39                                                                                                               |                   | 013 |              | X                                          |                                            |                                         |                    |                    |                    |                               |                              |
| 40                                                                                                               |                   | 122 |              | X                                          |                                            |                                         |                    |                    |                    |                               |                              |
| 41                                                                                                               |                   | 123 |              | X                                          |                                            |                                         |                    |                    |                    |                               |                              |
| 42                                                                                                               |                   | 090 |              | X                                          |                                            |                                         |                    |                    |                    |                               |                              |
| 45                                                                                                               |                   | 085 |              | X                                          |                                            |                                         |                    |                    |                    |                               |                              |
| 47                                                                                                               | 107               |     |              |                                            | X                                          |                                         |                    |                    |                    | X                             |                              |
