# Supplementary material for: Bacterial biofilms predominate in both acute and chronic human lung infections
Source: PubMed Central journal article supplement — Thorax. 2022 Jan 11;77(10):1015–22. doi: 10.1136/thoraxjnl-2021-217576 (PMC9510407; doi:10.1136/thoraxjnl-2021-217576), 2022-01-11
Supplement: thoraxjnl-2021-217576supp006.pdf [file thoraxjnl-2021-217576supp006.pdf]

| <b>Supplemental table 5: Diagnostic procedure of expectorated material from the lower respiratory tract of patients with or without pneumonia.</b> |                                                                                 |                                                                      |                                                                         |                                                      |                                                     |                                    |                                                                |
|----------------------------------------------------------------------------------------------------------------------------------------------------|---------------------------------------------------------------------------------|----------------------------------------------------------------------|-------------------------------------------------------------------------|------------------------------------------------------|-----------------------------------------------------|------------------------------------|----------------------------------------------------------------|
|                                                                                                                                                    | <b>Chocolate blood agar plates (CBA)<sup>a</sup><br/>(CO<sub>2</sub>, 35°C)</b> | <b>Blood agar plates (BA)<sup>b</sup><br/>(CO<sub>2</sub>, 35°C)</b> | <b>Solid lactose agar plates ('Blue plates')<sup>c</sup><br/>(35°C)</b> | <b>Resistance agar plates<sup>d</sup><br/>(35°C)</b> | <b>Sabouraud agar plates<sup>e</sup><br/>(37°C)</b> | <b>NaCl<sup>f</sup><br/>(35°C)</b> | <b>BCSA agar plates<sup>g</sup><br/>(CO<sub>2</sub>, 35°C)</b> |
| <b>Standard diagnostic</b>                                                                                                                         | 1 day                                                                           | 1 day                                                                | 1 day                                                                   |                                                      |                                                     |                                    |                                                                |
| <b>Extended diagnostic</b>                                                                                                                         | 1-3 days                                                                        | 1-3 days                                                             | 1-3 days                                                                | 1-3 days                                             | 1-5 days                                            | 1-2 days                           | 1-3 days                                                       |

<sup>a</sup>**Chocolate blood agar plates (CBA):** (36.0 g L<sup>-1</sup> GC Agar Base (15 g L<sup>-1</sup> Peptone, 1.0 g L<sup>-1</sup> Corn Starch, 4 g L<sup>-1</sup> Dipotassium phosphate, 1 g L<sup>-1</sup> Monopotassium phosphate, 5 g L<sup>-1</sup> Sodium chloride, 10 g L<sup>-1</sup> agar), 10.0 g L<sup>-1</sup> Iso Vitalex Enrichment, 10.0 g L<sup>-1</sup> Hemoglobin) (SSI)

<sup>b</sup>**Blood agar plates (BA):**

<sup>c</sup>**Solid lactose agar plates ('Blue plates):** A modified Conradi-Drigalskimedium containing 10 g/L detergent, 1 g/L Na<sub>2</sub>S<sub>2</sub>O<sub>3</sub>·H<sub>2</sub>O, 0.1 g/L bromothymol blue, 9 g/L lactose and 0.4 g/L glucose, pH 8.0; (SSI)

<sup>d</sup>**Resistance agar plates:**

<sup>e</sup>**Sabouraud agar plates:**

<sup>f</sup>**NaCl:**

<sup>g</sup>**BCSA agar plates:**
