# Supplementary material for: Bacterial biofilms predominate in both acute and chronic human lung infections
Source: PubMed Central journal article supplement — Thorax. 2022 Jan 11;77(10):1015–22. doi: 10.1136/thoraxjnl-2021-217576 (PMC9510407; doi:10.1136/thoraxjnl-2021-217576), 2022-01-11
Supplement: thoraxjnl-2021-217576supp008.pdf [file thoraxjnl-2021-217576supp008.pdf]

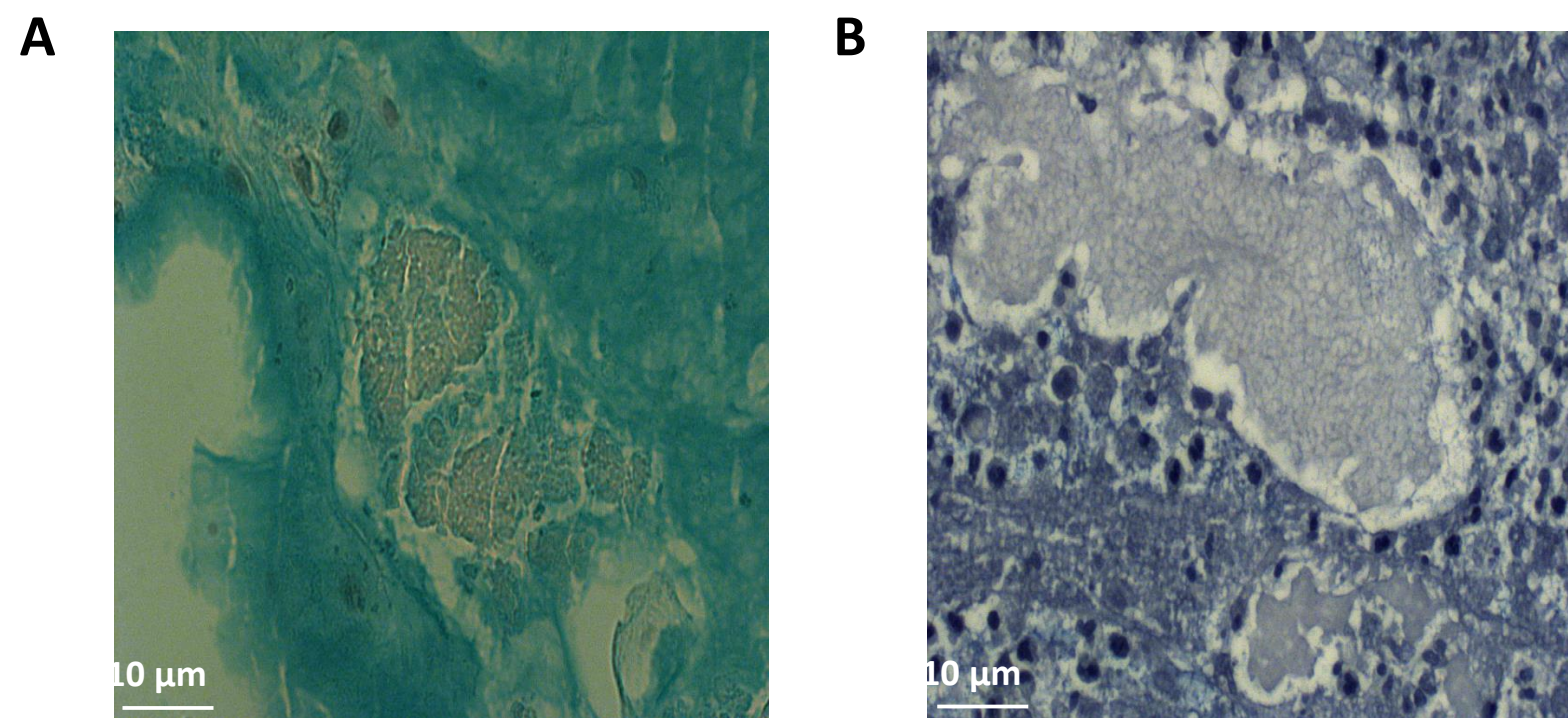

**Supplemental figure 2: Brightfield microscopy images of bacterial biofilms found in sputum samples from CAP patients.** Samples were stained with Alcian Blue polysaccharide stain to visualize polysaccharide within the biofilms as part of the matrix. In both images, a visible scaffolding of stringy polysaccharide can be observed within the biofilms. The mucus surrounding the biofilms are highly stained as well as it contains large amounts of polysaccharide as well. In both images, several eukaryotic nuclei can be observed surrounding the biofilms, although in image B to a much higher degree. **(A)** This image was obtained with a color camera to display the blue staining. **(B)** This image was obtained using a mono-chrome camera which give high details but in black and white display. 630x.
